# Supplementary material for: First GC/MS identification of aqueous ammonia: utilization of ethenesulfonyl fluoride as a selective and rapid derivatization reagent of ammonia in aqueous media
Source: Royal Society of Chemistry journal article supplement (doi:10.1039/d3ay01071f), 2023-01-01
Supplement: d3ay01071f1.pdf [file d3ay01071f1.pdf]

## Supporting information

First GC/MS identification of aqueous ammonia: utilization of ethenesulfonyl fluoride as a selective and rapid derivatization reagent of ammonia in aqueous media

Ryosuke Shiraki<sup>\*, a, g</sup>, Kengo Wakigawa<sup>g</sup>, Shin Ogawa<sup>g</sup>, Akinaga Gohda<sup>g</sup>, Takeshi Mori<sup>\*, a, b, c</sup>,  
Yoshiki Katayama<sup>\*, a, b, c, d, e, f</sup>

<sup>a</sup> Graduate School of Systems Life Sciences, Kyushu University, 744 Motooka, Nishi-ku, Fukuoka 819-0395, Japan

<sup>b</sup> Department of Applied Chemistry, Faculty of Engineering, Kyushu University, 744 Motooka, Nishi-ku, Fukuoka 819-0395, Japan

<sup>c</sup> Center for future chemistry, Kyushu University, 744 Motooka, Nishi-ku, Fukuoka 819-0395, Japan

<sup>d</sup> International Research Center for Molecular Systems, Kyushu University, 744 Motooka, Nishi-ku, Fukuoka 819-0395, Japan

<sup>e</sup> Center for Advanced Medical Innovation, Kyushu University, 3-1-1 Maidashi, Higashi-ku, Fukuoka 812-8532, Japan

<sup>f</sup> Department of Biomedical Engineering, Chung Yuan Christian University, Taoyuan 32023, Taiwan

<sup>g</sup> Forensic Science Laboratory, Fukuoka Prefectural Police Headquarters, 7-7 Higashikoen, Hakata-ku, Fukuoka 812-8576, Japan

\* Corresponding author at: Forensic Science Laboratory, Fukuoka Prefectural Police Headquarters, 7-7 Higashikoen, Hakata-ku, Fukuoka 812-8576, Japan

and Kyushu University, Graduate School of Systems Life Sciences, 744 Motoooka, Nishi-ku,  
Fukuoka, 819-0395 Japan. Tel./fax: +81 92 802 2850.

*E-mail address:* s.ryosuke.8975@kyudai.jp (R.S.); mori.takeshi.880@m.kyushu-u.ac.jp (T.M.);

katayama.yoshiki.958@m.kyushu-u.ac.jp (Y. K.).

Table S1 Effects of pH on ammonia derivatization.

| pH   | Buffer solutions                                              | Mean $\pm$ SD   | Precision (% RSD) <sup>a</sup> |
|------|---------------------------------------------------------------|-----------------|--------------------------------|
| 6.0  | 0.1 mol/L C <sub>8</sub> H <sub>5</sub> KO <sub>4</sub> /NaOH | 2.64 $\pm$ 0.33 | 12.5                           |
| 7.0  | 0.1 mol/L KH <sub>2</sub> PO <sub>4</sub> /NaOH               | 6.62 $\pm$ 0.77 | 11.6                           |
| 8.0  | 0.1 mol/L H <sub>3</sub> BO <sub>3</sub> /KCl/NaOH            | 0.65 $\pm$ 0.01 | 0.4                            |
| 9.0  | 0.1 mol/L H <sub>3</sub> BO <sub>3</sub> /KCl/NaOH            | 1.43 $\pm$ 0.03 | 2.4                            |
| 10.0 | 0.1 mol/L H <sub>3</sub> BO <sub>3</sub> /KCl/NaOH            | 1.43 $\pm$ 0.12 | 8.7                            |
| 11.0 | 0.05 mol/L Na <sub>2</sub> HPO <sub>4</sub> /NaOH             | 5.45 $\pm$ 0.57 | 10.5                           |
| 12.0 | 0.05 mol/L Na <sub>2</sub> HPO <sub>4</sub> /NaOH             | 5.12 $\pm$ 0.47 | 9.2                            |
| 13.0 | 0.2 mol/L KCl/NaOH                                            | 4.66 $\pm$ 0.39 | 8.5                            |

<sup>a</sup> Precision (% relative standard deviation) was defined as (standard deviation/mean peak area ratio to the IS)  $\times$  100.

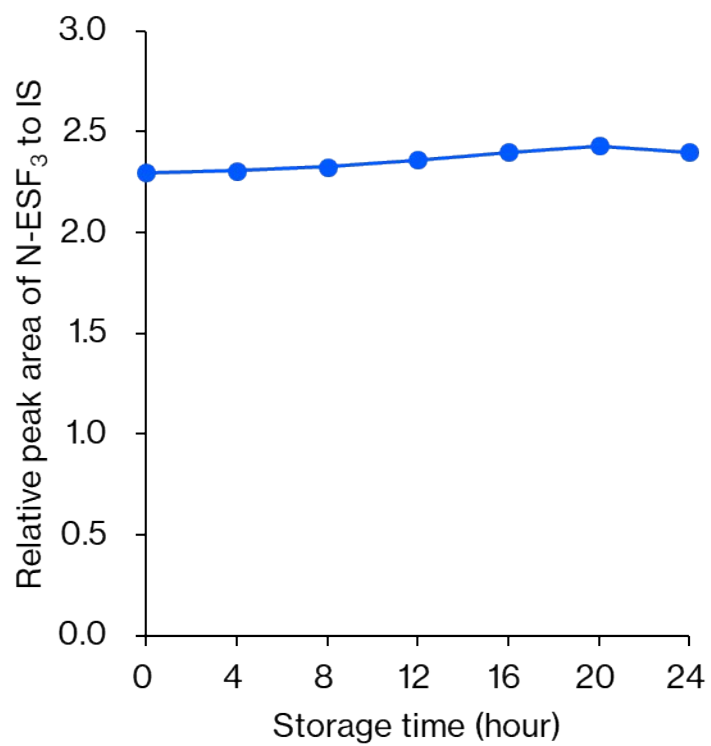

Fig. S1. Effect of storage time of the ethyl acetate extract of the derivatized reaction solution on the GC/MS analysis. The extract was stored at room temperature before the analysis.

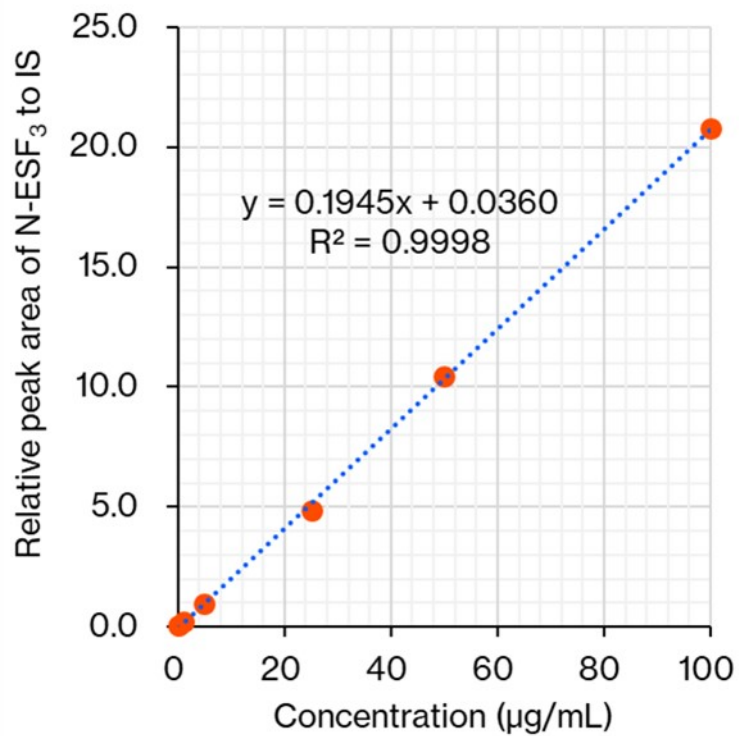

Fig. S2. Calibration curve showing the peak areas for N-ESF<sub>3</sub> generated from ammonia concentrations ranging from 0.10 to 100.0 µg/mL.
